# Supplementary material
Source: PubMed Central journal article supplement (PMC5458637)
Supplement: NIHMS792014-supplement-2.pdf [file NIHMS792014-supplement-2.pdf]

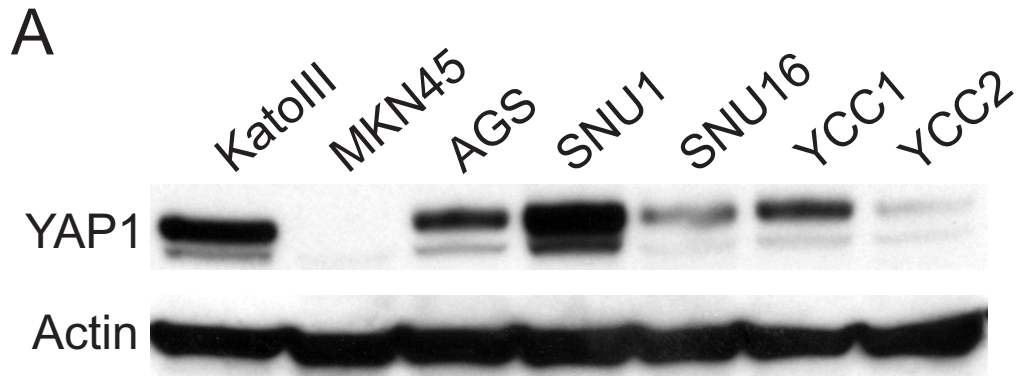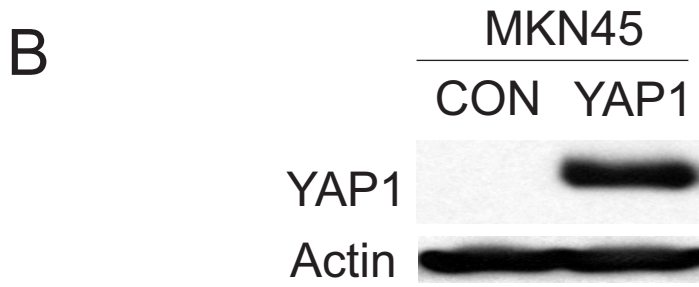

**Supplementary Figure 1.** Expression of YAP1 in gastric cancer cells.

(A) Expression of YAP1 in gastric cancer cell lines was determined by Western blot with the use of anti-YAP1 antibodies. (B) Expression of constitutively active mutant YAP1-S127A in MKN45 cells. CON, control.
