# Supplementary material
Source: PubMed Central journal article supplement (PMC5458637)
Supplement: NIHMS792014-supplement-4.pdf [file NIHMS792014-supplement-4.pdf]

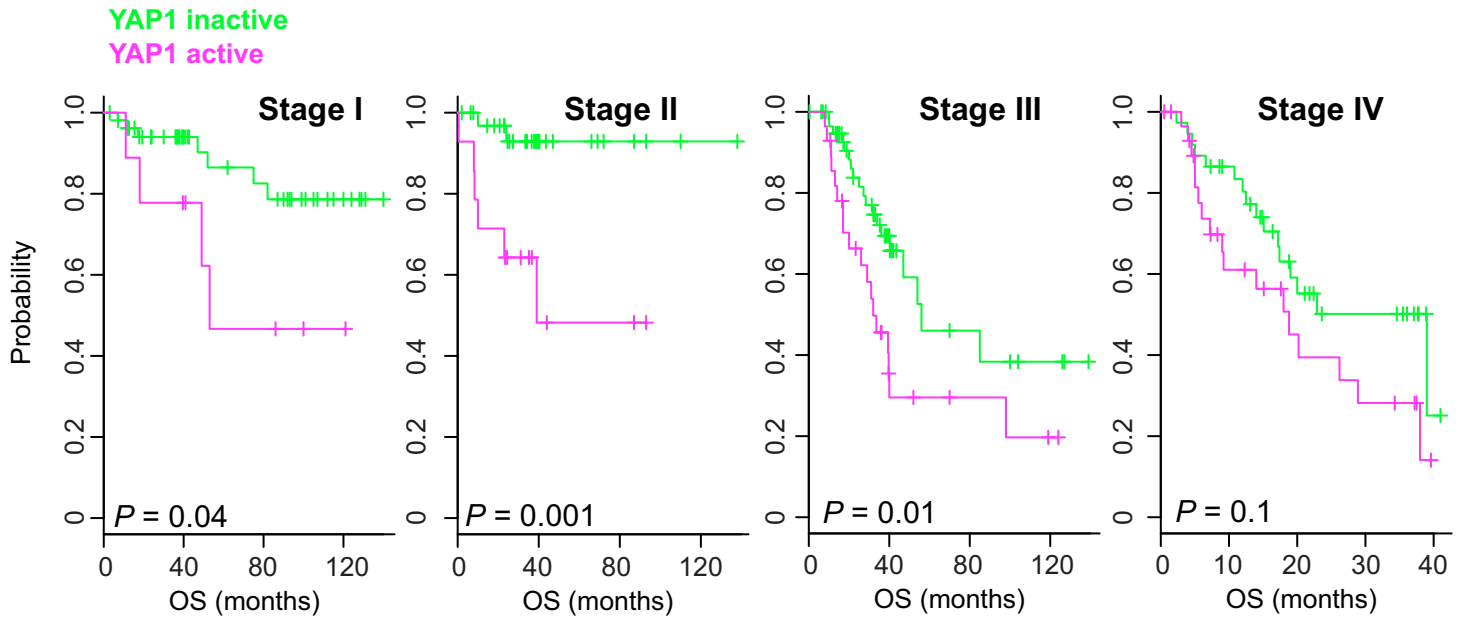

**Supplementary Figure 3. YAP1 signature is independent of TNM stages.**

Kaplan-Meier plots of overall survival (OS) of patients with gastric cancer from training cohort stratified by AJCC disease stage and YAP1 signature subgroup (active or inactive YAP1 gastric cancer). Stage information was not available from 7 patients. P values were obtained by using the log-rank test. Censored data are indicated by + symbol.
