# Supplementary material
Source: PubMed Central journal article supplement (PMC5458637)
Supplement: NIHMS792014-supplement-5.pdf [file NIHMS792014-supplement-5.pdf]

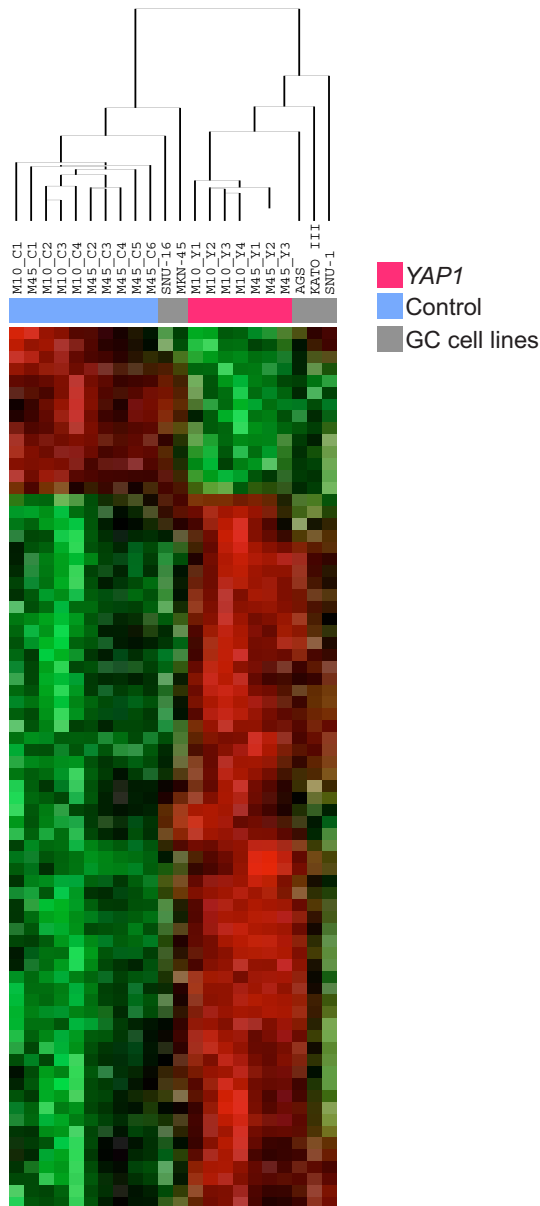

**Supplementary Figure 4. Hierarchical clustering analysis of YAP1 signature in 5 GC cell lines.**

Gene expression data from 5 GC cell lines were merged with YAP1-specific gene expression data from MKN45 and MCF10A cells and clustered together. ACS, KatoIII, and SNU1 were co-clustered with cell lines overexpressing YAP1 and their expression patterns were highly similar to YAP1-overexpressing cell lines. 74 genes were shared by both data sets.
