# Supplementary material
Source: PubMed Central journal article supplement (PMC5458637)
Supplement: NIHMS792014-supplement-6.pdf [file NIHMS792014-supplement-6.pdf]

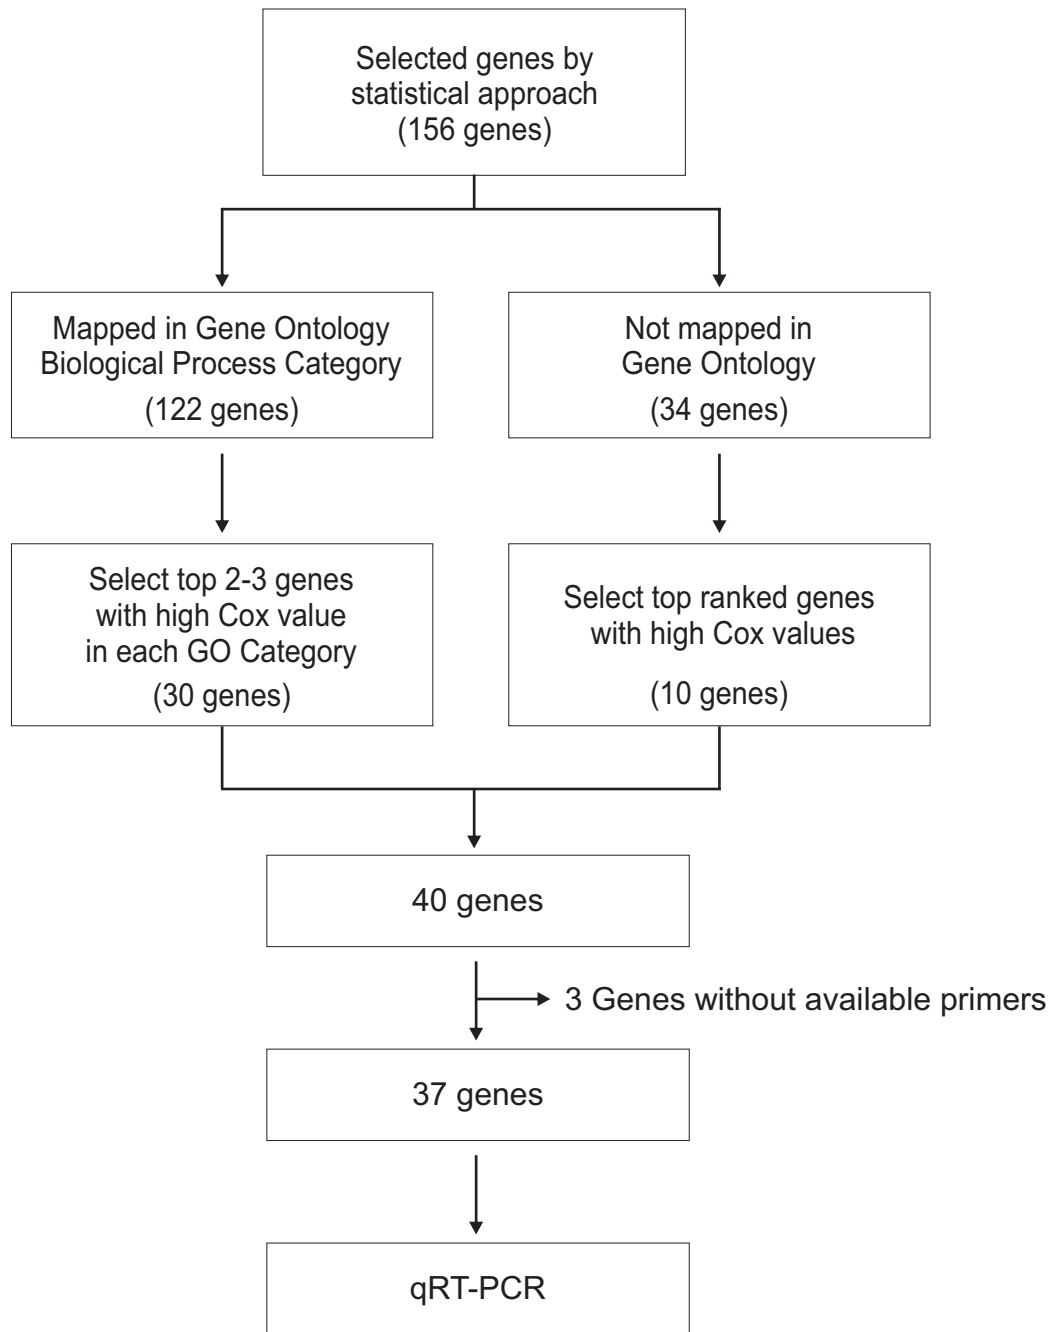

**Supplementary Figure 5.** Selection of candidate genes for quantitative reverse transcription (qRT) PCR experiments. GO, Gene Ontology database.
