# Supplementary material
Source: PubMed Central journal article supplement (PMC5458637)
Supplement: NIHMS792014-supplement-8.pdf [file NIHMS792014-supplement-8.pdf]

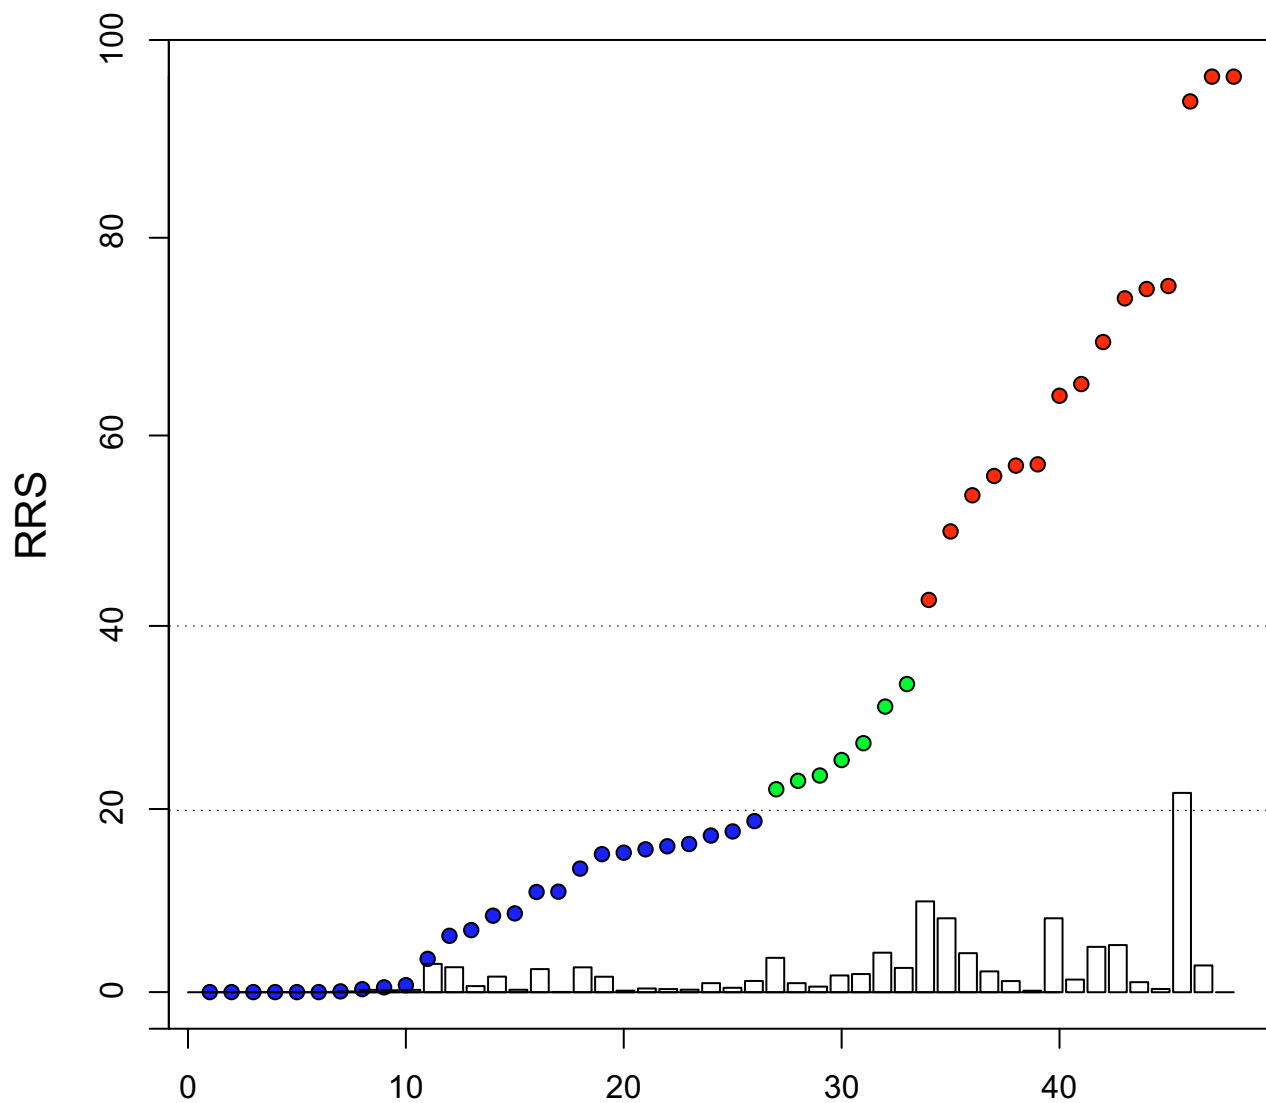

**Supplementary Figure 7. Distribution of RRS and cut-off scores for stratification of patients in training cohort.** Closed circles represent RRS of each patient and bar graph represents interval of RRS between patients as indicated. First cut-off (40) was chosen between two patients with largest interval of RRS. Second cut-off (20) was chosen between two patients with largest interval of RRS among those with RRS less than 40. Intervals too closed to 0 or 100 were excluded from analysis.
