# Supplementary material
Source: PubMed Central journal article supplement (PMC5458637)
Supplement: NIHMS792014-supplement-9.pdf [file NIHMS792014-supplement-9.pdf]

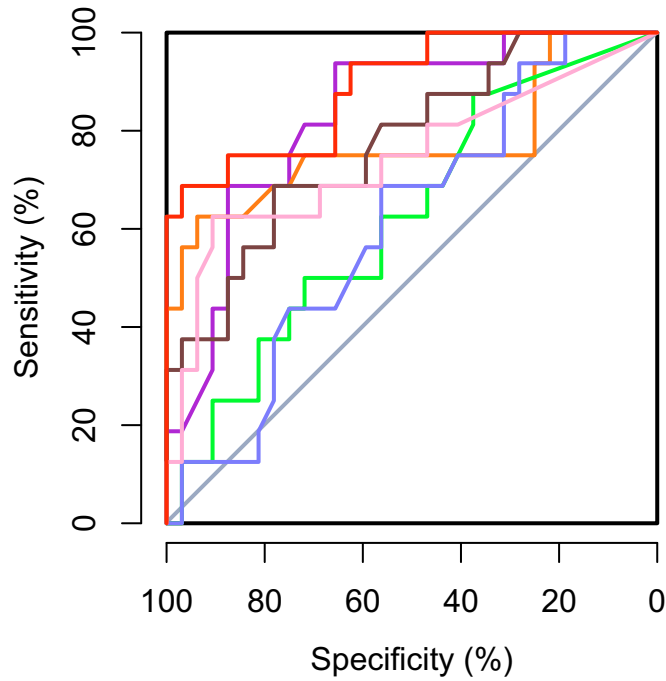

**RRS: 89.1% (77.9%–97.3%,  $P = 1.1 \times 10^{-6}$ )**  
**GADD45B: 83.1% (69.9%–93.7%,  $P = 0.0001$ )**  
**IGFBP4: 77.4% (60.7%–93.0%,  $P = 0.001$ )**  
**IGFBP4: 62.3% (43.8%–77.8%,  $P = 0.08$ )**  
**SPOCK1: 77.5% (63.5%–90.0%,  $P = 0.001$ )**  
**SULF1: 61.1% (43.8%–77.0%,  $P = 0.1$ )**  
**THBS4: 74.2% (57.6%–88.5%,  $P = 0.002$ )**

**Supplementary Figure 8. ROC curves showing the predictive accuracy for recurrence.**

Prognostic significance of each marker was estimated by AUC from ROC analysis for recurrence. 95% confidential interval was presented in parenthesis. AUC: area under curve, ROC; receiver operating characteristics.
