# Supplementary material
Source: PubMed Central journal article supplement (PMC5458637)
Supplement: NIHMS792014-supplement-11.pdf [file NIHMS792014-supplement-11.pdf]

**Supplementary Table 1. Distribution of candidate genes in biological process categories of the Gene Ontology database.**

| <b>GO Biological Process Tier 1 Category</b> | <b>Number of genes*</b> |
|----------------------------------------------|-------------------------|
| Cellular process                             | 91                      |
| Biological regulation                        | 86                      |
| Multicellular organismal process             | 71                      |
| Developmental process                        | 64                      |
| Metabolic process                            | 38                      |
| Response to stimulus                         | 38                      |
| Cellular component organization              | 35                      |
| Biological adhesion                          | 31                      |
| Localization                                 | 22                      |
| Establishment of localization                | 15                      |
| Cellular component biogenesis                | 14                      |
| Locomotion                                   | 10                      |
| Death                                        | 6                       |
| Reproduction                                 | 5                       |
| Reproductive process                         | 5                       |
| Growth                                       | 5                       |
| Multiorganism process                        | 4                       |
| Rhythmic process                             | 3                       |
| Immune system process                        | 2                       |

\* Genes with multiple functions can fall into multiple categories.
