# Supplementary material
Source: PubMed Central journal article supplement (PMC5458637)
Supplement: NIHMS792014-supplement-12.pdf [file NIHMS792014-supplement-12.pdf]

**Supplementary Table 2. Genes used in development of the recurrence risk score assay.**

| Gene           | Cox Coefficient | Molecular Group    | Characteristic(s)          |
|----------------|-----------------|--------------------|----------------------------|
| <i>GADD45B</i> | 0.463           | GADD45B            | Stress response            |
| <i>IGFBP4</i>  | 0.315           | Cellular signaling | IGF and WNT pathways       |
| <i>SFRP4</i>   | 0.266           | Cellular signaling | IGF and WNT pathways       |
| <i>SPOCK1</i>  | 0.345           | Microenvironment   | Invasion, stromal response |
| <i>SULF1</i>   | 0.245           | Microenvironment   | Invasion, stromal response |
| <i>THBS</i>    | 0.228           | Microenvironment   | Invasion, stromal response |
| <i>ACTB</i>    |                 |                    | Reference                  |
| <i>FTL</i>     |                 |                    | Reference                  |
| <i>GAPDH</i>   |                 |                    | Reference                  |
