# Supplementary material
Source: PubMed Central journal article supplement (PMC5458637)
Supplement: NIHMS792014-supplement-13.pdf [file NIHMS792014-supplement-13.pdf]

**Supplementary Table 3. Univariate and Multivariate Cox Regression Analyses of Recurrence Free Survival Durations of Patients in the Validation Cohort.**

| Variable                             | Univariate Analysis      |          | Multivariate Analysis*   |          |
|--------------------------------------|--------------------------|----------|--------------------------|----------|
|                                      | Hazard Ratio<br>(95% CI) | <i>P</i> | Hazard Ratio<br>(95% CI) | <i>P</i> |
| Patient Sex<br>(Male or Female)      | 0.74 (0.48-1.1)          | 0.1      | 0.87 (0.54-1.2)          | 0.33     |
| Age<br>(>70 years)                   | 1.4 (0.7-2.3)            | 0.2      | 1.4 (0.86-2.4)           | 0.16     |
| Location<br>(Upper 1/3 or lower 2/3) | 0.96 (0.57-1.6)          | 0.87     |                          |          |
| TNM stage<br>(3/4 or 1/2)            | 5.1 (3.2-8.3)            | <0.001   | 4.7 (2.9-7.6)            | <0.001   |
| Lauren<br>(Diffuse or Intestinal)    | 1.1 (0.64-1.7)           | 0.8      |                          |          |
| RRS<br>(High or Int/Low)             | 1.92 (1.02-3.6)          | 0.04     | 1.6 (1.02-2.4)           | 0.03     |

\* In the multivariate model, only variables with  $P < 0.2$  in univariate analysis were only included. Abbreviations: TNM, tumor-node-metastasis; RRS, recurrence risk score.
